# Supplementary material for: A cost-effective green antisolvent towards reproducible fabrication of high-efficiency perovskite solar cells
Source: Royal Society of Chemistry journal article supplement (doi:10.1039/d5cc02707a), 2025-01-01
Supplement: d5cc02707a1.pdf [file d5cc02707a1.pdf]

Supplementary Information (SI) for ChemComm.  
This journal is © The Royal Society of Chemistry 2025

## Supporting Information

### Cost-effective green antisolvent towards reproducible fabrication of high-efficiency perovskite solar cells

Hui Li,<sup>\*a</sup> Zhe Wu,<sup>a,b</sup> Junhui Han,<sup>a</sup> Meiqiu Xie<sup>\*a</sup> and Jizheng Wang<sup>b</sup>

<sup>a</sup> New Energy Technology Engineering Laboratory of Jiangsu Province, School of Science, Nanjing University of Posts and Telecommunications, Nanjing 210023, P. R. China

<sup>b</sup> Beijing National Laboratory for Molecular Sciences, CAS Key Laboratory of Organic Solids, Institute of Chemistry, Chinese Academy of Sciences, Beijing 100190, P. R. China

\*Corresponding author: lihui1986@njupt.edu.cn, mqxie@njupt.edu.cn

## Experimental Section

### *Materials:*

The SnO<sub>2</sub> colloid precursor was purchased from Alfa Aesar. N, N-dimethylformamide (DMF), dimethyl sulfoxide (DMSO), Tert-butanol (TBA), and chlorobenzene (CB) were purchased from Sigma-Aldrich. PbI<sub>2</sub>, FAI, MAI, CsI, bis(trifluoromethane) sulfonimide lithium salt (Li-TFSI), 4-tert-butylpyridine (TBP) and Spiro-OMeTAD were purchased from Xi'an Yuri Solar Co., Ltd.

### *Solar cells Fabrication:*

The ITO glass substrate (1.5×1.5 cm) was cleaned with deionized water, acetone and isopropanol respectively for 15 minutes. Then the clean substrate was dried by a nitrogen stream, and treated with oxygen plasma for 5 minutes. The SnO<sub>2</sub> colloidal precursor was diluted with ultrapure water (volume ratio 9:40) to prepare the SnO<sub>2</sub> precursor. The SnO<sub>2</sub> precursor was spin-coated on the ITO substrate at a speed of 3500 rpm for 30 s, and then

annealed at 150°C for 30 minutes in the air (relative humidity RH=40%). Then the substrate was transferred to a nitrogen glove box to prepare the perovskite film. The perovskite precursor solution was prepared by dissolving corresponding amounts of CsI (30 mg), FAI (377.3 mg), PbI<sub>2</sub> (1102.4 mg), and MACl (51.8 mg) in DMF: DMSO (8:2, 5:5, 2:8 and 0:10 v/v) mixed solvent (1567  $\mu$ L). The perovskite film was prepared by one-step solution deposition method. 60  $\mu$ L perovskite precursor solution was deposited onto ITO/SnO<sub>2</sub> substrates and a two-step spin coating procedure with 1000 rpm for 10 s and 5000 rpm for 30 s was adopted. During the second spin-coating step, antisolvent (TBA or CB) was dripped on the rotating substrate at 1<sup>th</sup>, 5<sup>th</sup>, 10<sup>th</sup>, 15<sup>th</sup>, 20<sup>th</sup>, or 25<sup>th</sup> s. After that, the sample was annealed at 120°C for 60 min in a box (relative humidity RH=20-30%). The Spiro-OMeTAD solution was prepared by dissolving 72.3 mg Spiro-OMeTAD with 28.8  $\mu$ L TBP and 35  $\mu$ L LiTFSI (260 mg mL<sup>-1</sup> in ACN) in 1 mL chlorobenzene. Spiro-OMeTAD solution was then spin-coated on the perovskite layer with 4000 rpm for 30 s. Finally, about 120 nm Au was deposited on the spiro-OMeTAD layer.

### ***Characterization:***

FTIR spectra were measured by using VERTEX 70v (BRUKER, Germany). The wavenumber range was 400-4000 cm<sup>-1</sup>, the resolution was 4 cm<sup>-1</sup>, the scanning mode was a reflection mode, and the scan number was 64. XPS was measured by XPS machine (ESCALAB250XI, Thermo Fisher Scientific). The X-ray diffraction patterns were measured by using a Rigaku-2500 X-ray diffractometer with an X-ray tube (Cu K $\alpha$ ,  $\lambda$  =1.5406 Å). The UV light source is He I, and the energy of He I is 21.22 eV. The basic vacuum of the analytical chamber is 3.0x10<sup>-8</sup> Torr, and the bias voltage is -9 V. Scanning electron microscopy (SEM) and energy dispersive spectrometer (EDS) images were observed by using a JEOL JSM-8020 field-emission scanning electron microscope (JEOL, Japan) at 5-10 kV. EQE was recorded using a Newport Oriel QE-200 (Newport 300 W xenon lamp). All J-V curves were measured using a source meter (Keithley 2420, USA) under AM 1.5 sunlight at an irradiance of 100 mW cm<sup>-2</sup> provided by a solar simulator (Newport, Oriel Sol3A Class AAA, 94043A). The device area was 0.04 cm<sup>2</sup>. Light intensity was calibrated using a monocrystalline silicon

reference cell with a KG5 window (Newport, Oriel 91150). Electrochemical impedance spectroscopy (EIS) was measured by Zennium (Zahner).

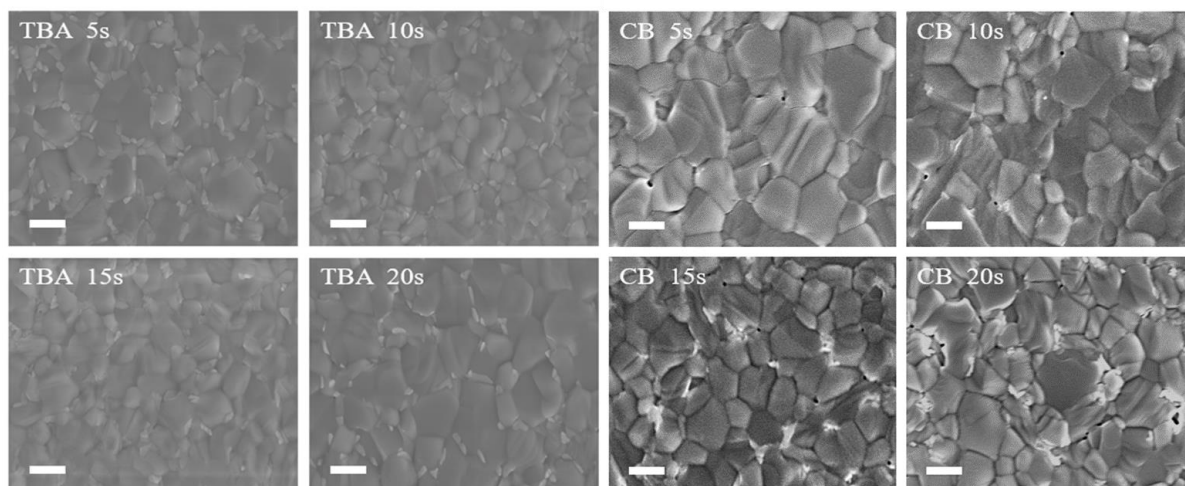

**Figure S1** SEM images of perovskite films prepared with different antisolvent dripping time (DMF:DMSO ratio is 8:1, dripping volume is 300  $\mu\text{L}$ ), all scale bars are 1.5  $\mu\text{m}$ .

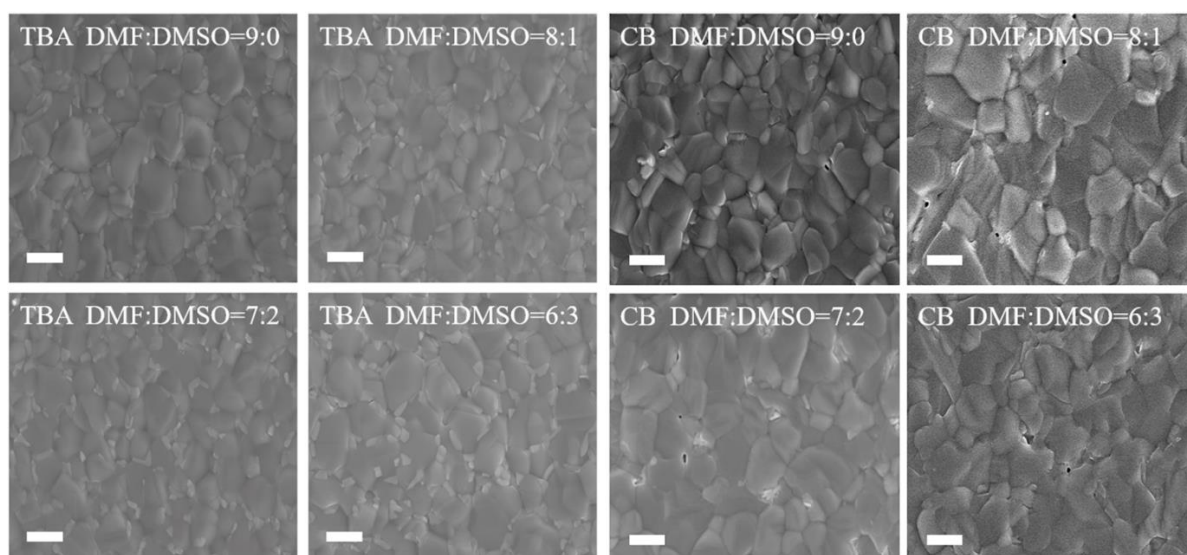

**Figure S2** SEM images of perovskite films prepared with different DMF:DMSO ratio (dripping time is 10<sup>th</sup> s, dripping volume is 300  $\mu\text{L}$ ), all scale bars are 1.5  $\mu\text{m}$ .

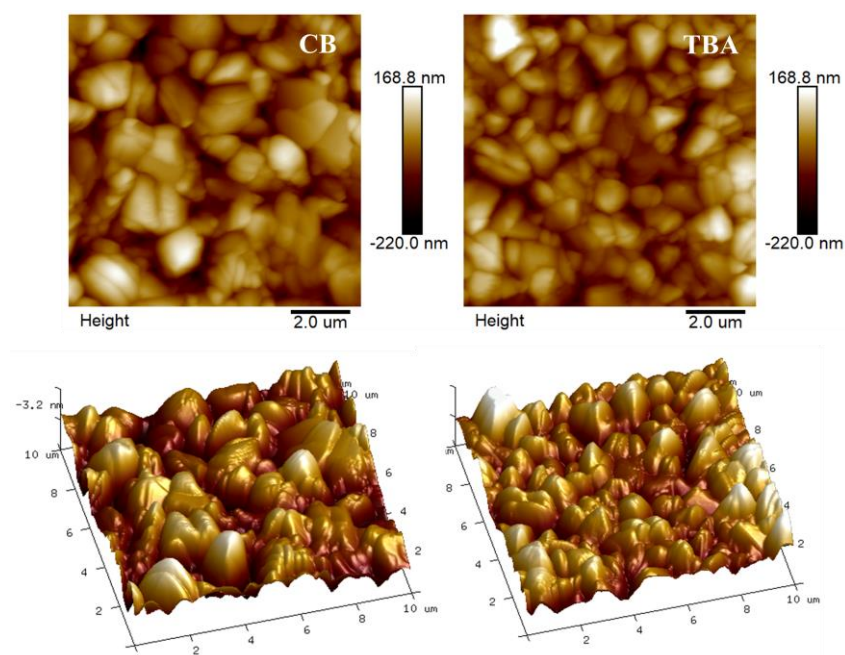

**Figure S3** AFM images of perovskite films treated with CB or TBA antisolvent.

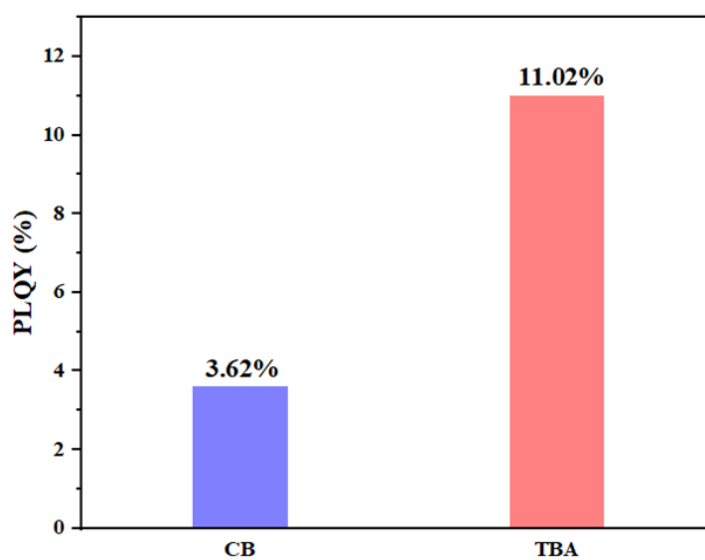

**Figure S4** Absolute photoluminescence quantum yield (PLQY) measurements.

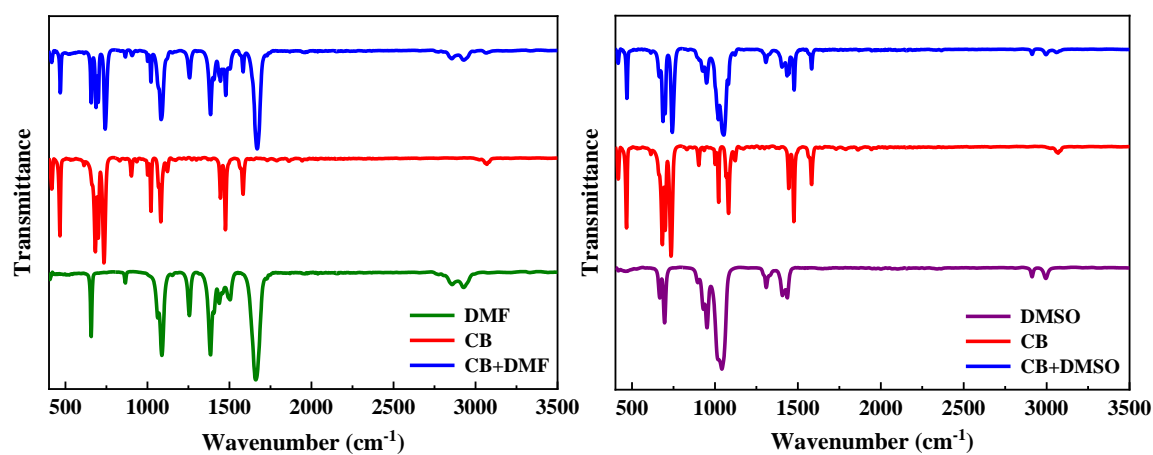

**Figure S5** FTIR spectroscopy of solvent.

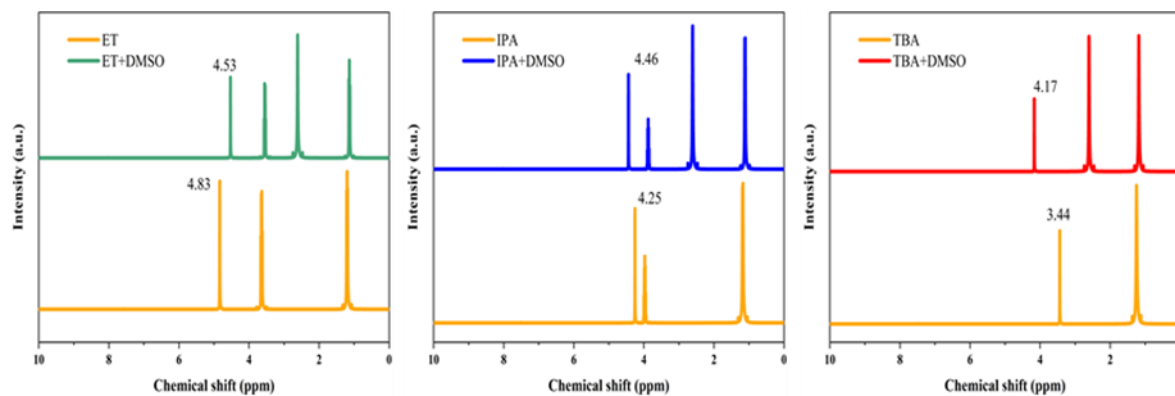

**Figure S6**  $^1\text{H}$  NMR spectra of solvent.

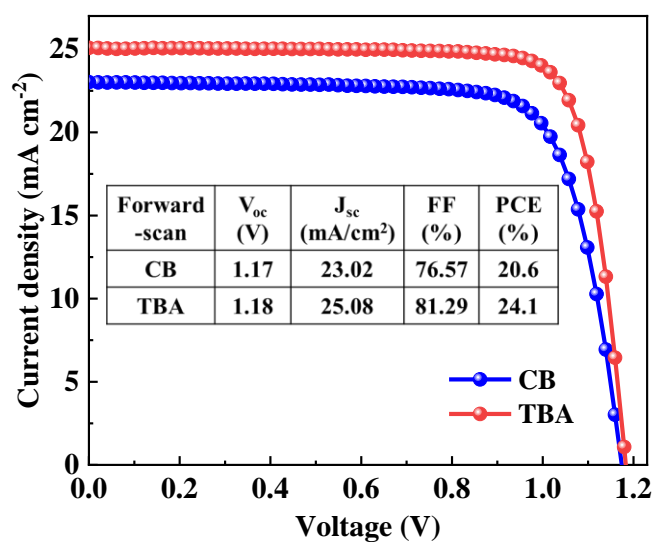

**Figure S7** J-V curves of devices (Forward-scan).

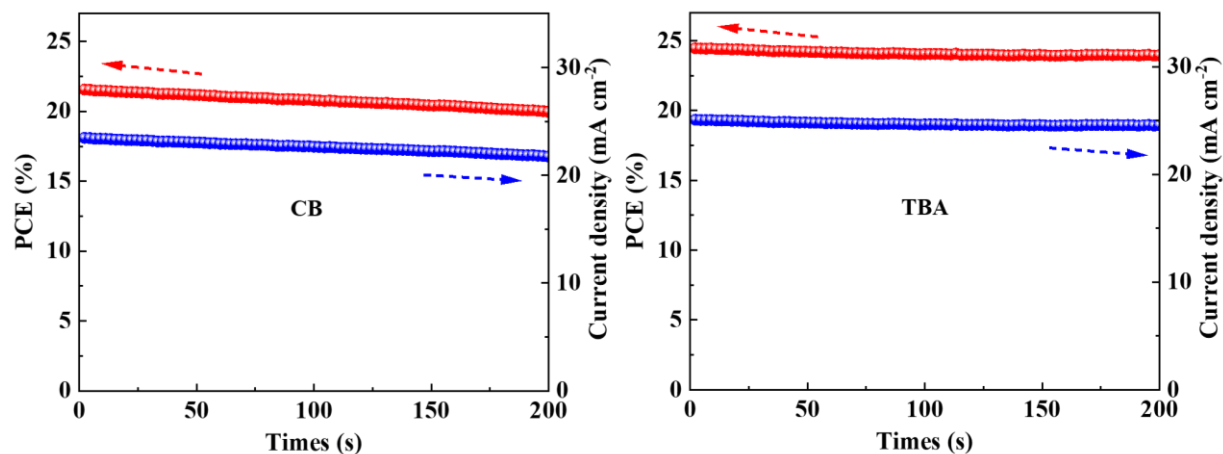

**Figure S8** Steady-state output of devices at MPP under 1-sun illumination.

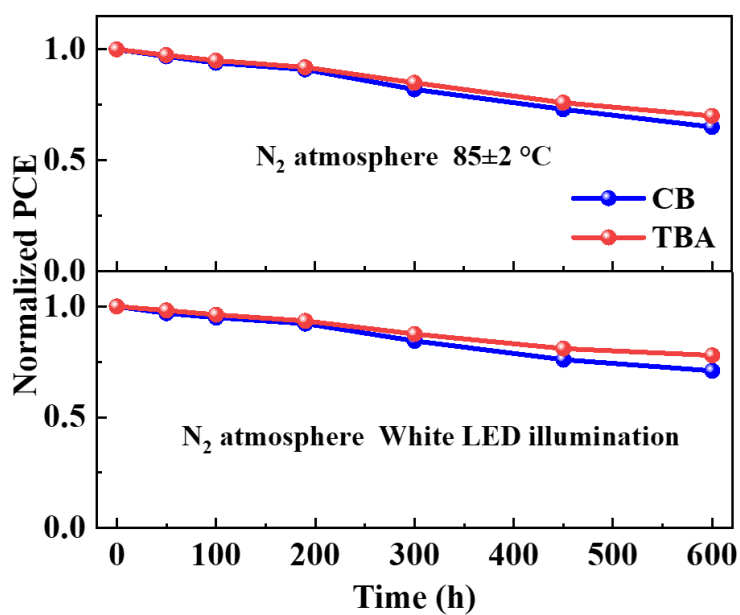

**Figure S9** Thermal stability at 85 °C and light stability in simulated one sun illumination achieved by a white-light LED array.

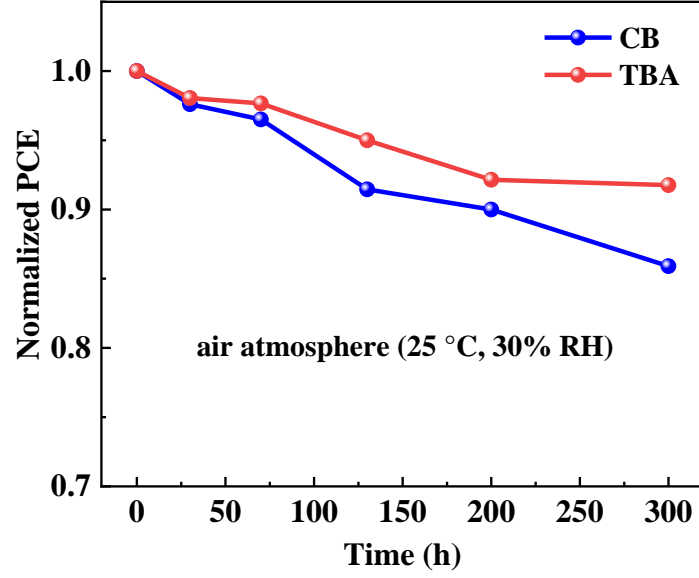

**Figure S10** Long-term stability of devices in ambient air at 25 °C and 30% relative humidity without encapsulation.

The average recombination lifetime was estimated from the TRPL spectra fitted by a bi-exponential decay function, the equation is as follows:<sup>1</sup>

$$\tau_{ave} = \frac{\sum A_i \tau_i^2}{\sum A_i \tau_i} \quad S1$$

where  $\tau_i$  is decay times and  $A_i$  is amplitudes.

**Table S1** Parameters of the TRPL spectra of perovskite films prepared with CB or TBA antisolvent.

| Sample | $\tau_1$ [ns] | $A_1$ | $\tau_2$ [ns] | $A_2$  | $\tau_{ave}$ [ns] |
|--------|---------------|-------|---------------|--------|-------------------|
| CB     | 223.38        | 16.15 | 1852.27       | 173.99 | 1834.24           |
| TBA    | 342.55        | 31.63 | 3382.88       | 304.64 | 3351.25           |

The trap density ( $N_t$ ) can be determined from the curves via the following relation:<sup>2</sup>

$$N_t = \frac{2\epsilon_0\epsilon_r V_{TFL}}{eL^2} \quad S2$$

where  $\epsilon_0$  is the vacuum permittivity,  $\epsilon_r$  is the relative dielectric constant of the perovskite,  $V_{TFL}$  is the trap-filled limit voltage,  $e$  is the electron charge, and  $L$  is the perovskite film thickness.

**Table S2** Calculated trap density ( $N_t$ ) of perovskite films prepared with CB or TBA antisolvent.

| Sample | L [nm] | $\epsilon$ | $V_{TFL}$ [V] | $N_t [\times 10^{15} \text{cm}^{-3}]$ |
|--------|--------|------------|---------------|---------------------------------------|
| CB     | 620    | 42         | 0.30          | 3.6                                   |
| TBA    | 620    | 42         | 0.24          | 2.9                                   |

**Table S3** EIS parameters of PSCs prepared with CB or TBA antisolvent.

| Sample | $R_s [\Omega]$ | $R_{tr} [\text{k}\Omega]$ | $C_{tr} [\text{F}]$ | $R_{rec} [\text{k}\Omega]$ | $C_{rec} [\text{F}]$ |
|--------|----------------|---------------------------|---------------------|----------------------------|----------------------|
| CB     | 1.48           | 0.777                     | 1.083E-7            | 12.69                      | 5.576E-7             |
| TBA    | 0.92           | 0.443                     | 9.709E-8            | 15.64                      | 2.234E-7             |

## References

- 1 J. Zhuang, P. Mao, Y. Luan, X. Yi, Z. Tu, Y. Zhang, Y. Yi, Y. Wei, N. Chen, T. Lin, F. Wang, C. Li, and J. Wang, *ACS Energy Lett.*, 2019, **4**, 2913.
- 2 L. Zhang, H. Li, J. Zhuang, Y. Luan, S. Wu, G. Niu, L. Chu, X. Cao, X. Li, and J. Wang, *J. Mater. Chem. C*, 2021, **9**, 15428-15434.
